# Supplementary material for: Long-term trends in the PM 2.5 - and O 3 -related mortality burdens in the United States under emission reductions from 1990 to 2010
Source: Copernicus journal article supplement (doi:10.5194/acp-2018-498), 2018-05-31
Supplement: Supplementary file 1 [file acp-2018-498-supplement.pdf]

# Supplemental Material

## Long-term trends in the PM<sub>2.5</sub>- and O<sub>3</sub>-related mortality burdens in the United States under emission reductions from 1990 to 2010

Yuqiang Zhang, J. Jason West, Rohit Mathur, Jia Xing, Christian Hogrefe, Shawn J. Roselle, Jesse O. Bash, Jonathan E. Pleim, Chuen-Meei Gan, David C. Wong

### Table of Contents

1. Estimating county-level baseline mortality rates from CDC WONDER database
2. Sensitivity analysis for the O<sub>3</sub> mortality burden with simulated pre-industrial O<sub>3</sub> background concentration

### References

#### 1. Estimating county-level baseline mortality rates from CDC WONDER database

To get the baseline mortality rates for counties with suppressed data, we grouped counties with unsuppressed mortality in each state, calculated the total deaths, and then subtracted these unsuppressed deaths from the total deaths in that state. The resulting total deaths count for the suppressed counties were then divided by the total population in these suppressed counties to get the baseline mortality rates. In some instances, the state-level death counts were also suppressed (e.g. for IHD and STROKE, age-specific baseline mortality rates are required). When this happens, we calculated the national-level baseline mortality rates and assign the value to those suppressed states.

To get the baseline mortality rates for the counties with “missing” or “unreliable” data (hereafter, “unreliable counties”), we summed the total deaths from the unreliable counties in each state, divided the summed total deaths by the total population in these unreliable counties to calculate the average baseline mortality rate ( $y_0$ ), and assigned this average  $y_0$  to those counties; if the summed deaths from those counties in this state are still unreliable/missing, we aggregated

unreliable counties at a regional level, dividing the US into four regions: Northeast, Midwest, South and West (BenMAP, 2017), recalculated the baseline mortality rates at the regional level, and then assign the regional  $y_0$  to the counties; if there are still counties with no available data, we estimated and assigned the national-level  $y_0$ . By using the state/regional/national average to estimate the suppressed or unreliable mortality data, the accuracy of the local baseline mortality rates can be improved (Tiwari et al. 2014).

## **2. Sensitivity analysis for the O<sub>3</sub> mortality burden with simulated pre-industrial O<sub>3</sub> background concentration**

We did a sensitivity analysis by using the “pre-industrial” O<sub>3</sub> concentration as the counterfactual, which evaluates the burden due to “anthropogenic” pollution, following previous studies (Anenberg et al. 2010; Fang et al. 2013; Lelieveld et al. 2013; Silva et al. 2013, 2016). We obtain the pre-industrial O<sub>3</sub> concentrations by using an ensemble of 14 global chemistry–climate models under the Atmospheric Chemistry and Climate Model Intercomparison Project (ACCMIP) (Lamarque et al. 2013; Silva et al. 2013), in which pre-industrial air quality was simulated using anthropogenic emissions in 1850. The pre-industrial summertime (April to September) average of 1hr daily maximum O<sub>3</sub> simulated under the ACCMIP is higher in the southeast and intermountain areas of US (>30 ppbv), and lower in the northeast and central U.S. (>28 ppbv) (see Fig. S10), which are both higher than the counterfactual assumed by Fann et al. (2012) (30 ppb in the west and 22 ppb in the east). According to the HIF, higher background O<sub>3</sub> concentrations are expected to lead to lower O<sub>3</sub> mortality burden estimates in the current year. The summertime O<sub>3</sub> concentrations from the ensemble mean are lower than the average O<sub>3</sub> counterfactual (37.6 ppbv) we originally used in the O<sub>3</sub> mortality burden, which is expected to lead to higher O<sub>3</sub> mortality burden estimates.

## References

- Anderson RN, Miniño AM, Hoyert DL, Rosenberg HM. 2001. Comparability of cause of death between ICD-9 and ICD-10: preliminary estimates. *Natl. Vital Stat. Rep.* 49: 1–32.
- Anderson RN, Rosenberg HM. 2003. Disease classification: Measuring the effect of the tenth revision of the international classification of diseases on cause-of-death data in the United States. *Stat. Med.* 22:1551–1570; doi:10.1002/sim.1511.
- Anenberg SC, Horowitz LW, Tong DQ, West JJ. 2010. An estimate of the global burden of anthropogenic ozone and fine particulate matter on premature human mortality using atmospheric modeling. *Environ. Health Perspect.* 118:1189–1195; doi:10.1289/ehp.0901220.
- Environmental Benefits Mapping and Analysis Program – Community Edition, User’s Manual, Appendices, 2017 (BenMAP 2017), [https://www.epa.gov/sites/production/files/2017-04/documents/benmap\\_ce\\_um\\_appendices\\_april\\_2017.pdf](https://www.epa.gov/sites/production/files/2017-04/documents/benmap_ce_um_appendices_april_2017.pdf), [accessed in 04/25/2017].
- Fang Y, Naik V, Horowitz LW, Mauzerall DL. 2013. Air pollution and associated human mortality: The role of air pollutant emissions, climate change and methane concentration increases from the preindustrial period to present. *Atmos. Chem. Phys.* 13:1377–1394; doi:10.5194/acp-13-1377-2013.
- Fann N, Lamson AD, Anenberg SC, Wesson K, Risley D, Hubbell BJ. 2012. Estimating the national public health burden associated with exposure to ambient PM<sub>2.5</sub> and ozone. *Risk Anal.* 32:81–95; doi:10.1111/j.1539-6924.2011.01630.x.
- Lelieveld J, Barlas C, Giannadaki D, Pozzer A. 2013. Model calculated global, regional and megacity premature mortality due to air pollution. *Atmos. Chem. Phys.* 13:7023–7037; doi:10.5194/acp-13-7023-2013.
- Silva RA, West JJ, Zhang Y, Anenberg SC, Lamarque J-F, Shindell DT, et al. 2013. Global premature mortality due to anthropogenic outdoor air pollution and the contribution of past climate change. *Environ. Res. Lett.* 8:34005; doi:10.1088/1748-9326/8/3/034005.
- Silva RA, West JJ, Lamarque JF, Shindell DT, Collins WJ, Dalsoren S, et al. 2016. The effect of future ambient air pollution on human premature mortality to 2100 using output from the ACCMIP model ensemble. *Atmos. Chem. Phys.* 16:9847–9862; doi:10.5194/acp-16-9847-2016.
- Tiwari C, Beyer K, Rushton G. 2014. The impact of data suppression on local mortality rates: The case of cdc wonder. *Am. J. Public Health* 104:1386–1388; doi:10.2105/AJPH.2014.301900.

Table S1. The list of International Classification of Diseases (ICD) codes for specific causes of death, with ICD9 implemented from 1990 to 1998, and ICD10 from 1999 to 2010.

|                                                      | <b>ICD9 code</b>                                                                                                                                                   | <b>ICD10</b>                                                                                                                                                                                                                |
|------------------------------------------------------|--------------------------------------------------------------------------------------------------------------------------------------------------------------------|-----------------------------------------------------------------------------------------------------------------------------------------------------------------------------------------------------------------------------|
| chronic respiratory diseases (RESP)                  | 070.22-070.23, 070.32-070.33, 070.44-070.49, 070.54-070.59, 135, 456.0-456.2, 470-475, 477-478, 490-492.8, 493-496, 500-506, 508, 515-519, 571, 572.3-572.8, 573.9 | B18, D86.0, D86.2, D86.9, I85, J30-J39, J40-J47, J60-J65, J66-J70(except J69), J82, J84, J92, J93.0, J93.1, J95, J98 (except J98.1, J98.2, J98.3, J98.9), K70, K71.7, K72.1-K72.9, K73-K74, K75.2-K75.9, K76.6-K76.7, K76.9 |
| chronic obstructive pulmonary disease (COPD)         | 490-492.8, 494, 496                                                                                                                                                | J40-J44, J47                                                                                                                                                                                                                |
| ischemic heart disease (IHD)                         | 410-414, 429.2                                                                                                                                                     | I20-I25                                                                                                                                                                                                                     |
| lung cancer (LC)                                     | 162-162.9, 231.1, 231.2, 231.8, 235.7                                                                                                                              | C33-C34, D02.1-D02.2, D38.1                                                                                                                                                                                                 |
| cerebrovascular disease and ischemic stroke (STROKE) | 430-435, 437.0-437.2, 437.5-437.8                                                                                                                                  | I60-I63, I65-I67, I69.0-I69.3                                                                                                                                                                                               |

Table S2. The comparability ratios for baseline mortality rates for specific causes of death between ICD9 and ICD10. The ratios for each disease were calculated as the total deaths categorized in ICD10 divided by the same total deaths categorized in ICD9 (Anderson et al., 2001; Anderson & Rosenberg, 2003). To eliminate the discontinuity, the health burden from 1990 to 1998 is multiplied by this ratio. For details please see methods.

| <b>Diseases</b> | <b>Ratio</b> |
|-----------------|--------------|
| RESP            | 1.046        |
| COPD            | 1.056        |
| IHD             | 0.999        |
| LC              | 0.984        |
| STROKE          | 1.059        |

Table S3. The regional mean of annual PM<sub>2.5</sub> and summertime average of 1hr daily maximum O<sub>3</sub> concentration in 1990, 2010, and decadal trends (units  $\mu\text{g m}^{-3}$  per decade for PM<sub>2.5</sub>, and ppbv per decade for O<sub>3</sub>). Bold values indicate trends that are significant with P-values for the standard Student-t test smaller than 0.05. Regions are defined as the US nine climate regions (see Fig. S3).

|                 | Annual PM <sub>2.5</sub> ( $\mu\text{g m}^{-3}$ ) |      |              | Summertime (Apr-Sep) average of 1hr daily maximum O <sub>3</sub> (ppbv) |      |             |
|-----------------|---------------------------------------------------|------|--------------|-------------------------------------------------------------------------|------|-------------|
|                 | 1990                                              | 2010 | trends       | 1990                                                                    | 2010 | trends      |
| Northwest       | 4.2                                               | 3.6  | -0.10        | 46                                                                      | 43   | <b>-1.0</b> |
| West            | 4.9                                               | 3.3  | 0.16         | 55                                                                      | 52   | <b>-1.1</b> |
| West N. Central | 4.8                                               | 4.2  | <b>-0.37</b> | 50                                                                      | 47   | -1.1        |
| Southwest       | 3.6                                               | 3.1  | -0.07        | 55                                                                      | 53   | <b>-1.0</b> |
| South           | 9.9                                               | 7.9  | <b>-1.00</b> | 58                                                                      | 52   | <b>-2.7</b> |
| East N. Central | 11.9                                              | 7.7  | <b>-2.06</b> | 51                                                                      | 47   | <b>-2.2</b> |
| Central         | 18.0                                              | 11.5 | <b>-3.48</b> | 61                                                                      | 53   | <b>-5.1</b> |
| Southeast       | 14.0                                              | 9.6  | <b>-1.53</b> | 62                                                                      | 52   | <b>-4.3</b> |
| Northeast       | 14.7                                              | 7.9  | <b>-3.14</b> | 57                                                                      | 50   | <b>-4.4</b> |

Table S4. The mortality burden associated with ambient PM<sub>2.5</sub> for specific causes of death (COPD, IHD, LC and STROKE), and with O<sub>3</sub> (for COPD and RESP) from 1990 to 2010, and their trends (deaths yr<sup>-1</sup>). For O<sub>3</sub>, COPD is a subset of RESP.

| Year         | COPD       | IHD          | LC          | STROKE      | COPD-O <sub>3</sub> | RESP-O <sub>3</sub> |
|--------------|------------|--------------|-------------|-------------|---------------------|---------------------|
| 1990         | 5941       | 96495        | 12469       | 8830        | 6875                | 10903               |
| 1991         | 6090       | 95053        | 12447       | 8392        | 7334                | 11545               |
| 1992         | 6074       | 93108        | 12392       | 8135        | 6627                | 10355               |
| 1993         | 6365       | 91860        | 11986       | 7614        | 7334                | 11226               |
| 1994         | 6638       | 92066        | 12495       | 8054        | 7691                | 11816               |
| 1995         | 6103       | 87079        | 11505       | 7303        | 8215                | 12651               |
| 1996         | 6381       | 86883        | 11756       | 7384        | 7435                | 11403               |
| 1997         | 6213       | 81730        | 11199       | 7083        | 7580                | 11590               |
| 1998         | 6386       | 79298        | 11323       | 6891        | 9175                | 13981               |
| 1999         | 6870       | 81395        | 11351       | 7153        | 9275                | 13499               |
| 2000         | 6846       | 79664        | 11728       | 7478        | 8475                | 12471               |
| 2001         | 6571       | 75530        | 11253       | 6859        | 8607                | 12732               |
| 2002         | 5742       | 68842        | 9835        | 5894        | 8296                | 12208               |
| 2003         | 5978       | 68317        | 10092       | 6053        | 7978                | 11760               |
| 2004         | 5529       | 62375        | 9635        | 5693        | 6651                | 9999                |
| 2005         | 5965       | 61577        | 9785        | 5357        | 8671                | 13039               |
| 2006         | 5363       | 58175        | 9183        | 4840        | 7651                | 11863               |
| 2007         | 5797       | 56745        | 9578        | 4956        | 8252                | 12716               |
| 2008         | 5771       | 54163        | 8677        | 4464        | 7797                | 11834               |
| 2009         | 4509       | 45319        | 7049        | 3580        | 6738                | 10379               |
| 2010         | 4465       | 43611        | 6963        | 3541        | 7942                | 12275               |
| <b>Trend</b> | <b>-64</b> | <b>-2636</b> | <b>-251</b> | <b>-241</b> | <b>24</b>           | <b>24</b>           |

Table S5. The trends (TRE) and relative changes (REL) for the spatial average, population-weighted average air quality concentration, total mortality burdens change and due to changes in each of three factors (concentration only, baseline mortality rates only and population only), and where the concentration change is excluded, for PM<sub>2.5</sub> and O<sub>3</sub> from 1990-2000, 2000-2010, and 1990 to 2010. The units for the trends in concentrations are  $\mu\text{g m}^{-3}\text{decade}^{-1}$  for PM<sub>2.5</sub>, and ppbv  $\text{decade}^{-1}$  for O<sub>3</sub>. The units for the trends of mortality burden are deaths  $\text{yr}^{-1}$ . The REL for the pollutants concentration changes are calculated as (Last year – First year)/First year, while for REL in mortality are used linear regression periods for each period to avoid inter-annual variability.

|                         |                               | 1990-2000 |      | 2000-2010 |      | 1990-2010 |      |
|-------------------------|-------------------------------|-----------|------|-----------|------|-----------|------|
|                         |                               | TRE       | REL  | TRE       | REL  | TRE       | REL  |
| <b>PM<sub>2.5</sub></b> | Spatial average               | -0.77     | -7%  | -1.4      | -24% | -1.1      | -29% |
|                         | Population-weighted average   | -2.9      | -14% | -3.8      | -29% | -3.2      | -39% |
|                         | Mortality burden              | -2100     | -15% | -4400     | -45% | -3200     | -53% |
|                         | Concentration change only     | -1400     | -9%  | -2800     | -30% | -2000     | -36% |
|                         | MortalityRates change only    | -2500     | -20% | -3100     | -31% | -2800     | -45% |
|                         | Population change only        | 2200      | 18%  | 2800      | 19%  | 2400      | 40%  |
|                         | Concentration change excluded | -700      | -6%  | -2300     | -19% | -1600     | -24% |
| <b>O<sub>3</sub></b>    | Spatial average               | -0.32     | -2%  | -4.4      | -8%  | -2.4      | -9%  |
|                         | Population-weighted average   | -1.2      | -4%  | -4.0      | -5%  | -3.0      | -9%  |
|                         | Mortality burden              | 240       | 14%  | -70       | -2%  | 24        | 13%  |
|                         | Concentration change only     | -60       | -11% | -210      | -16% | -160      | -25% |
|                         | MortalityRates change only    | 140       | 11%  | 110       | 8%   | 90        | 20%  |
|                         | Population change only        | 170       | 15%  | 160       | 12%  | 160       | 30%  |
|                         | Concentration change excluded | 330       | 28%  | 310       | 21%  | 280       | 55%  |

Table S6. The standard deviation (STD) and coefficient of variation (CV) for the detrended annual mortality burden for PM<sub>2.5</sub> and O<sub>3</sub> for the periods 1990-2000, 2000-2010, and 1990 to 2010. In addition to the total mortality burdens, we show mortality burdens considering changes from 1990 to 2010 in each factor individually (concentration only, baseline mortality rates only and population only), and with the concentration change excluded. The units for the STD are  $\mu\text{g m}^{-3}$  and ppbv for PM<sub>2.5</sub> and O<sub>3</sub>.

|                         |                               | 1990-2000 |      | 2000-2010 |      | 1990-2010 |      |
|-------------------------|-------------------------------|-----------|------|-----------|------|-----------|------|
|                         |                               | STD       | CV   | STD       | CV   | STD       | CV   |
| <b>PM<sub>2.5</sub></b> | Mortality burden              | 4300      | 4%   | 4900      | 6%   | 4200      | 4%   |
|                         | Concentration change only     | 2800      | 2%   | 4700      | 5%   | 3700      | 3%   |
|                         | MortalityRates change only    | 1500      | 1%   | 1400      | 2%   | 1400      | 1%   |
|                         | Population change only        | 600       | 0.4% | 1300      | 0.8% | 1000      | 0.7% |
|                         | Concentration change excluded | 3100      | 3%   | 2800      | 3%   | 2800      | 3%   |
| <b>O<sub>3</sub></b>    | Mortality burden              | 1700      | 15%  | 1000      | 9%   | 1400      | 12%  |
|                         | Concentration change only     | 680       | 7%   | 660       | 8%   | 670       | 7%   |
|                         | MortalityRates change only    | 220       | 2%   | 290       | 2%   | 270       | 2%   |
|                         | Population change only        | 60        | 0.5% | 20        | 0.1% | 40        | 0.4% |
|                         | Concentration change excluded | 260       | 2%   | 380       | 2%   | 340       | 2%   |



Table S7. The relative (%) mortality burden changes for US 48 states and District of Columbia from 1990 to 2010, for the mortality burden calculated as the total, concentration change only, mortality rates change only and population change only. The relative changes are calculated as  $(2010-1990)/1990 \times 100\%$ .

|    | PM <sub>2.5</sub> -related mortality |               |                 |            | O <sub>3</sub> -related mortality |               |                 |            |
|----|--------------------------------------|---------------|-----------------|------------|-----------------------------------|---------------|-----------------|------------|
|    | Total                                | Concentration | Mortality Rates | Population | Total                             | Concentration | Mortality Rates | Population |
| AL | -45                                  | -34           | -36             | 36         | -5                                | -43           | 34              | 24         |
| AR | -33                                  | -25           | -32             | 32         | 20                                | -27           | 31              | 27         |
| AZ | -65                                  | -66           | -48             | 102        | 73                                | -6            | 2               | 84         |
| CA | -64                                  | -50           | -51             | 54         | 39                                | -3            | 6               | 40         |
| CO | -84                                  | -78           | -55             | 80         | 39                                | -22           | 14              | 59         |
| CT | -74                                  | -59           | -49             | 31         | -15                               | -28           | 8               | 11         |
| DC | -37                                  | -29           | -36             | 38         | -23                               | -19           | -21             | 21         |
| DE | -46                                  | -35           | -43             | 53         | 34                                | -23           | 28              | 36         |
| FL | -48                                  | -40           | -46             | 64         | 5                                 | -38           | 17              | 47         |
| GA | -38                                  | -28           | -48             | 75         | 14                                | -38           | 21              | 55         |
| IA | -50                                  | -30           | -39             | 21         | 1                                 | -29           | 26              | 13         |
| ID | -31                                  | -31           | -48             | 96         | 54                                | -21           | 21              | 65         |
| IL | -54                                  | -28           | -47             | 26         | 8                                 | -10           | 9               | 15         |
| IN | -46                                  | -28           | -41             | 33         | 25                                | -25           | 40              | 20         |
| KS | -35                                  | -11           | -42             | 28         | 21                                | -24           | 37              | 17         |
| KY | -43                                  | -28           | -38             | 35         | 10                                | -33           | 34              | 24         |
| LA | -51                                  | -34           | -43             | 32         | 2                                 | -30           | 25              | 15         |
| MA | -68                                  | -46           | -49             | 27         | -22                               | -37           | 7               | 14         |
| MD | -41                                  | -30           | -39             | 46         | 1                                 | -24           | 8               | 24         |
| ME | -99                                  | -98           | -52             | 42         | -46                               | -64           | 24              | 21         |
| MI | -56                                  | -40           | -42             | 33         | 13                                | -22           | 33              | 12         |
| MN | -57                                  | -30           | -55             | 42         | 18                                | -17           | 13              | 28         |
| MO | -39                                  | -24           | -37             | 30         | 12                                | -27           | 28              | 21         |
| MS | -55                                  | -35           | -44             | 28         | 5                                 | -37           | 38              | 23         |
| MT | -82                                  | -80           | -46             | 69         | 6                                 | -31           | 20              | 28         |
| NC | -41                                  | -30           | -47             | 68         | 19                                | -38           | 32              | 47         |

|    |     |     |     |     |     |     |     |     |
|----|-----|-----|-----|-----|-----|-----|-----|-----|
| ND | -69 | -58 | -46 | 28  | 1   | -38 | 39  | 9   |
| NE | -52 | -28 | -47 | 29  | 9   | -21 | 17  | 18  |
| NH | -84 | -74 | -51 | 51  | -34 | -54 | 14  | 25  |
| NJ | -59 | -39 | -48 | 34  | 8   | -16 | 9   | 18  |
| NM | -26 | -38 | -38 | 97  | 64  | -15 | 33  | 44  |
| NV | -97 | -98 | -52 | 175 | 76  | -15 | -10 | 140 |
| NY | -62 | -40 | -47 | 25  | -12 | -15 | -2  | 11  |
| OH | -50 | -30 | -42 | 28  | 18  | -21 | 34  | 12  |
| OK | -29 | -20 | -33 | 33  | 45  | -25 | 58  | 22  |
| OR | -65 | -45 | -56 | 55  | -27 | -53 | 14  | 41  |
| PA | -60 | -37 | -46 | 26  | -11 | -29 | 15  | 10  |
| RI | -73 | -55 | -47 | 23  | -10 | -35 | 25  | 10  |
| SC | -42 | -34 | -44 | 66  | 16  | -42 | 41  | 41  |
| SD | -51 | -35 | -44 | 29  | 17  | -32 | 40  | 19  |
| TN | -39 | -34 | -36 | 50  | 4   | -40 | 31  | 35  |
| TX | -36 | -35 | -46 | 73  | 34  | -28 | 26  | 50  |
| UT | -90 | -88 | -56 | 80  | 68  | -11 | 9   | 76  |
| VA | -43 | -32 | -43 | 56  | 10  | -27 | 19  | 30  |
| VT | -93 | -90 | -45 | 47  | -53 | -65 | 14  | 20  |
| WA | -57 | -45 | -49 | 63  | -27 | -52 | 9   | 44  |
| WI | -61 | -42 | -46 | 34  | 31  | -14 | 23  | 26  |
| WV | -54 | -34 | -40 | 22  | -7  | -38 | 38  | 11  |
| WY | -65 | -64 | -26 | 132 | 51  | -13 | 30  | 34  |

Table S8. The calculated PM<sub>2.5</sub>- and O<sub>3</sub>-related mortality burdens for the US from 1990 to 2010 with County-level baseline mortality rates and National-average baseline mortality rates. The absolute differences (Abs diff) are using the National-average method minus County-level method, and the relative differences (Rel diff) are calculated as (National-County)/County. Units are deaths yr<sup>-1</sup>.

| Year | PM <sub>2.5</sub> -related mortality |          |          |          | O <sub>3</sub> -related mortality |          |          |          |
|------|--------------------------------------|----------|----------|----------|-----------------------------------|----------|----------|----------|
|      | County                               | National | Abs diff | Rel diff | County                            | National | Abs diff | Rel diff |
| 1990 | 123735                               | 121587   | -2148    | -1.7%    | 10903                             | 10930    | 27       | 0.2%     |
| 1991 | 121982                               | 120015   | -1967    | -1.6%    | 11545                             | 11604    | 59       | 0.5%     |
| 1992 | 119709                               | 117734   | -1975    | -1.7%    | 10355                             | 10350    | -5       | 0.0%     |
| 1993 | 117825                               | 115686   | -2139    | -1.8%    | 11226                             | 11265    | 39       | 0.3%     |
| 1994 | 119253                               | 116909   | -2344    | -2.0%    | 11816                             | 11827    | 11       | 0.1%     |
| 1995 | 111990                               | 109589   | -2401    | -2.1%    | 12651                             | 12664    | 13       | 0.1%     |
| 1996 | 112404                               | 110353   | -2051    | -1.8%    | 11403                             | 11354    | -49      | -0.4%    |
| 1997 | 106225                               | 104335   | -1890    | -1.8%    | 11590                             | 11598    | 8        | 0.1%     |
| 1998 | 103898                               | 102113   | -1785    | -1.7%    | 13981                             | 13964    | -17      | -0.1%    |
| 1999 | 106770                               | 104891   | -1879    | -1.8%    | 13499                             | 13440    | -59      | -0.4%    |
| 2000 | 105717                               | 103691   | -2026    | -1.9%    | 12471                             | 12338    | -133     | -1.1%    |
| 2001 | 100213                               | 98533    | -1680    | -1.7%    | 12732                             | 12726    | -6       | 0.0%     |
| 2002 | 90312                                | 88907    | -1405    | -1.6%    | 12208                             | 12193    | -15      | -0.1%    |
| 2003 | 90441                                | 89082    | -1359    | -1.5%    | 11760                             | 11751    | -9       | -0.1%    |
| 2004 | 83231                                | 81862    | -1369    | -1.6%    | 9999                              | 10049    | 50       | 0.5%     |
| 2005 | 82684                                | 81200    | -1484    | -1.8%    | 13039                             | 13132    | 93       | 0.7%     |
| 2006 | 77561                                | 76208    | -1353    | -1.7%    | 11863                             | 11913    | 50       | 0.4%     |
| 2007 | 77076                                | 75865    | -1211    | -1.6%    | 12716                             | 12832    | 116      | 0.9%     |
| 2008 | 73074                                | 72031    | -1043    | -1.4%    | 11834                             | 12070    | 236      | 2.0%     |
| 2009 | 60457                                | 59642    | -815     | -1.3%    | 10379                             | 10557    | 178      | 1.7%     |
| 2010 | 58580                                | 57306    | -1274    | -2.2%    | 12275                             | 12507    | 232      | 1.9%     |

Table S9. Comparisons between estimates of PM<sub>2.5</sub>- related deaths in the US for the period 1990 to 2010 between this study and previous studies, corresponding to Figure 6 in the main paper.

| Health impact study                  | Disease category                                  | Air pollution metrics              | Year of deaths | Attributable deaths (thousands) |
|--------------------------------------|---------------------------------------------------|------------------------------------|----------------|---------------------------------|
| This study <sup>a</sup>              | COPD+IHD+LC+STROKE                                | Annual mean 24-h PM <sub>2.5</sub> | 1990           | 124 (71-178)                    |
|                                      |                                                   |                                    | 1995           | 112 (62-164)                    |
|                                      |                                                   |                                    | 2000           | 106 (57-157)                    |
|                                      |                                                   |                                    | 2005           | 83 (42-128)                     |
|                                      |                                                   |                                    | 2010           | 59 (25-99)                      |
| Fann et al., 2017 <sup>b</sup>       | Total all-cause deaths                            | Annual mean 24-h PM <sub>2.5</sub> | 1990           | 170 (110-220)                   |
|                                      |                                                   |                                    | 2000           | 140 (98-190)                    |
|                                      |                                                   |                                    | 2010           | 120 (83-160)                    |
| Cohen et al., 2017 <sup>a</sup>      | COPD+IHD+LC+STROKE + lower respiratory infections | Annual mean 24-h PM <sub>2.5</sub> | 1990           | 106 (84-129)                    |
|                                      |                                                   |                                    | 1995           | 107 (85-133)                    |
|                                      |                                                   |                                    | 2000           | 106 (84-133)                    |
|                                      |                                                   |                                    | 2005           | 100 (78-127)                    |
|                                      |                                                   |                                    | 2010           | 83 (64-108)                     |
| Punger & West, 2013 <sup>b</sup>     | Total all-cause deaths                            | Annual mean 24-h PM <sub>2.5</sub> | 2005           | 73 (43-93)                      |
|                                      |                                                   |                                    | 2005           | 130 (51-200)                    |
| Giannadaki et al., 2017 <sup>b</sup> | COPD+IHD+LC+STROKE + lower respiratory infections | Annual mean 24-h PM <sub>2.5</sub> | 2010           | 52 (25-76)                      |

<sup>a</sup>The exposed population for these studies are for adults above 25-year old.

<sup>b</sup>The exposed population for these studies are for adults above 30-year old.

Table S10. Comparisons between estimates of O<sub>3</sub>- related mortality burdens in the US for the period 1990 to 2010 between this study and previous studies, corresponding to Figure 6 in the main paper.

| Health impact study                                                   | Disease category | Air pollution metrics                        | Year of deaths | Attributable deaths (thousands) |
|-----------------------------------------------------------------------|------------------|----------------------------------------------|----------------|---------------------------------|
| This study as reported in Table S4 <sup>a</sup>                       | RESP             | Summertime 1-hr daily maximum O <sub>3</sub> | 1990           | 6.9 (2.3-11.0)                  |
|                                                                       |                  |                                              | 1995           | 8.2 (2.8-13.2)                  |
|                                                                       |                  |                                              | 2000           | 8.5 (2.9-13.6)                  |
|                                                                       |                  |                                              | 2005           | 8.7 (2.9-14.0)                  |
|                                                                       |                  |                                              | 2010           | 7.9 (2.7-12.8)                  |
| This study as reported in Table S4 <sup>a</sup>                       | COPD             | Summertime 1-hr daily maximum O <sub>3</sub> | 1990           | 6.9 (2.3-11.0)                  |
|                                                                       |                  |                                              | 1995           | 8.2 (2.8-13.2)                  |
|                                                                       |                  |                                              | 2000           | 8.5 (2.9-13.6)                  |
|                                                                       |                  |                                              | 2005           | 8.7 (2.0-14.0)                  |
|                                                                       |                  |                                              | 2010           | 7.9 (2.7-12.8)                  |
| This study with pre-industrial background O <sub>3</sub> <sup>a</sup> | RESP             | Summertime 1-hr daily maximum O <sub>3</sub> | 1990           | 15.0 (5.1-23.8)                 |
|                                                                       |                  |                                              | 1995           | 17.3 (5.9-27.5)                 |
|                                                                       |                  |                                              | 2000           | 17.6 (6.0-28.0)                 |
|                                                                       |                  |                                              | 2005           | 18.7 (6.4-29.8)                 |
|                                                                       |                  |                                              | 2010           | 18.4 (6.3-29.6)                 |
| Cohen et al., 2017 <sup>a</sup>                                       | COPD             | 3-month of 1-hr daily maximum O <sub>3</sub> | 1990           | 7.5 (2.9-12.5)                  |
|                                                                       |                  |                                              | 1995           | 9.2 (3.5-15.2)                  |
|                                                                       |                  |                                              | 2000           | 10.6 (4.0-17.6)                 |
|                                                                       |                  |                                              | 2005           | 11.1 (4.2-18.5)                 |
|                                                                       |                  |                                              | 2010           | 11.2 (4.3-18.7)                 |
|                                                                       |                  |                                              | 2015           | 11.7 (4.4-19.6)                 |
| Punger & West, 2013 <sup>b</sup>                                      | RESP             | 6-month of 1-hr daily maximum O <sub>3</sub> | 2005           | 24.0 (6.3-38.3)                 |
| Fann et al., 2012 <sup>b</sup>                                        | RESP             | Summertime daily 8-hour maximum              | 2005           | 19.0 (7.6-29.0)                 |

<sup>a</sup>The exposed population for these studies are for adults above 25-year old.

<sup>b</sup>The exposed population for these studies are for adults above 30-year old.

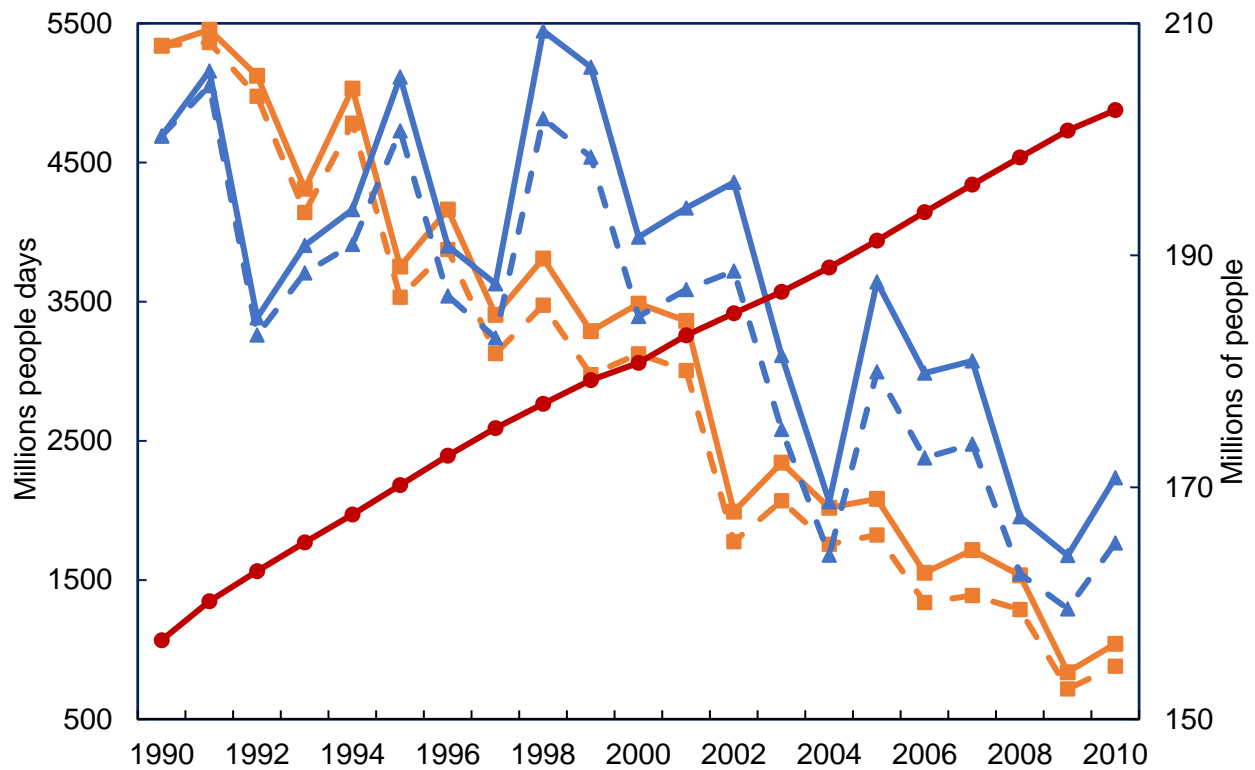

Figure S1. The population exposure exceedance using the adult population (> 25 yrs old) multiplied by the air quality exceedance days (million people-days, the number of days that exceed the daily PM<sub>2.5</sub> standard (35µg m<sup>-3</sup>), and the daily MDA8 O<sub>3</sub> standard (70 ppbv)), for each year for PM<sub>2.5</sub> (orange lines) and O<sub>3</sub> (blue lines). The dashed lines are the population exposure exceedance in the case where the population stays constant at the 1990 level. The red line is the US total adult population > 25 yrs old from 1990 to 2010 with the y-axis on the right.

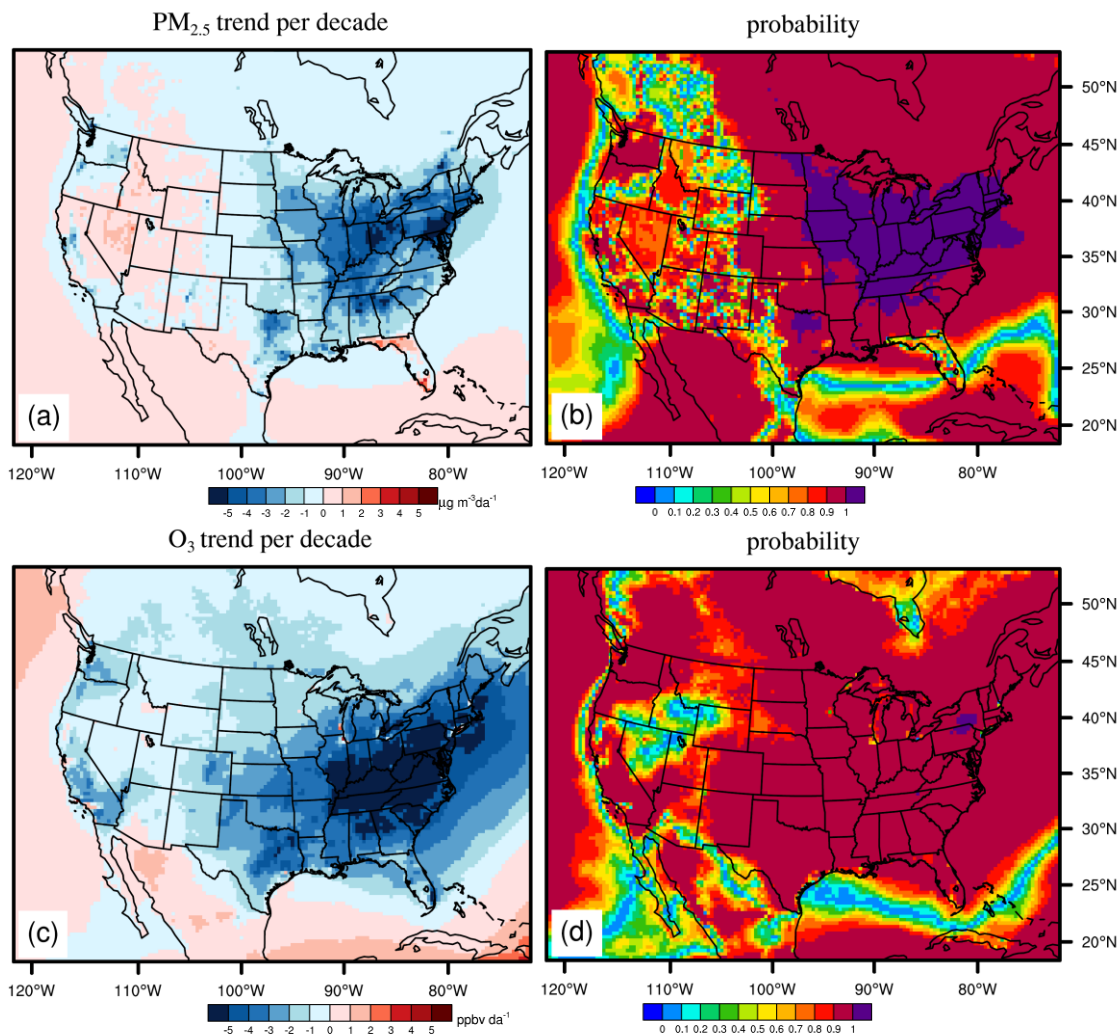

Figure S2. 21-yr air quality trends for annual mean PM<sub>2.5</sub> (a), and summertime (April to September) average of 1hr daily maximum O<sub>3</sub> (c) from 1990 to 2010, with the probability (the confidence estimated for the hypothesis that the trend is significant) for the trends (b,d). The purple color on the rightmost plot means the probability equals to 1.

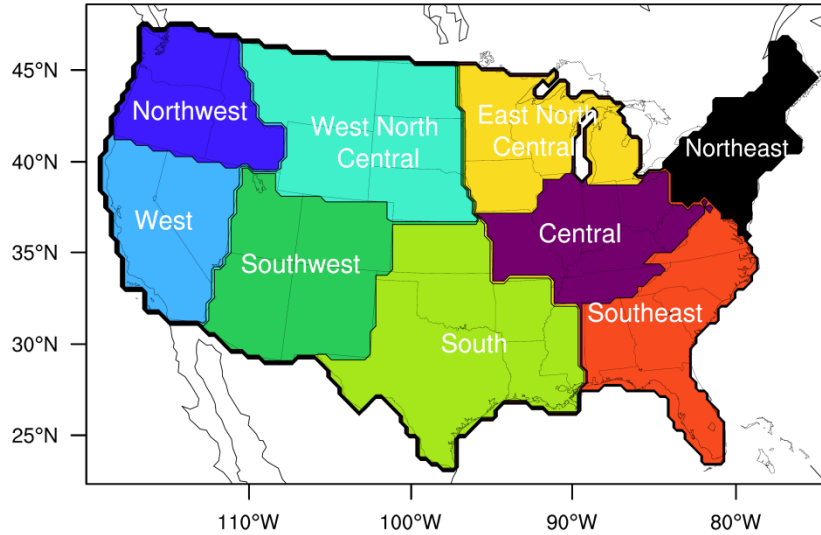

Figure S3. The nine US climate regions, following definitions from National Oceanic and Atmospheric Administration (<http://www.ncdc.noaa.gov/monitoring-references/maps/us-climate-regions.php>, accessed November 30 2017).

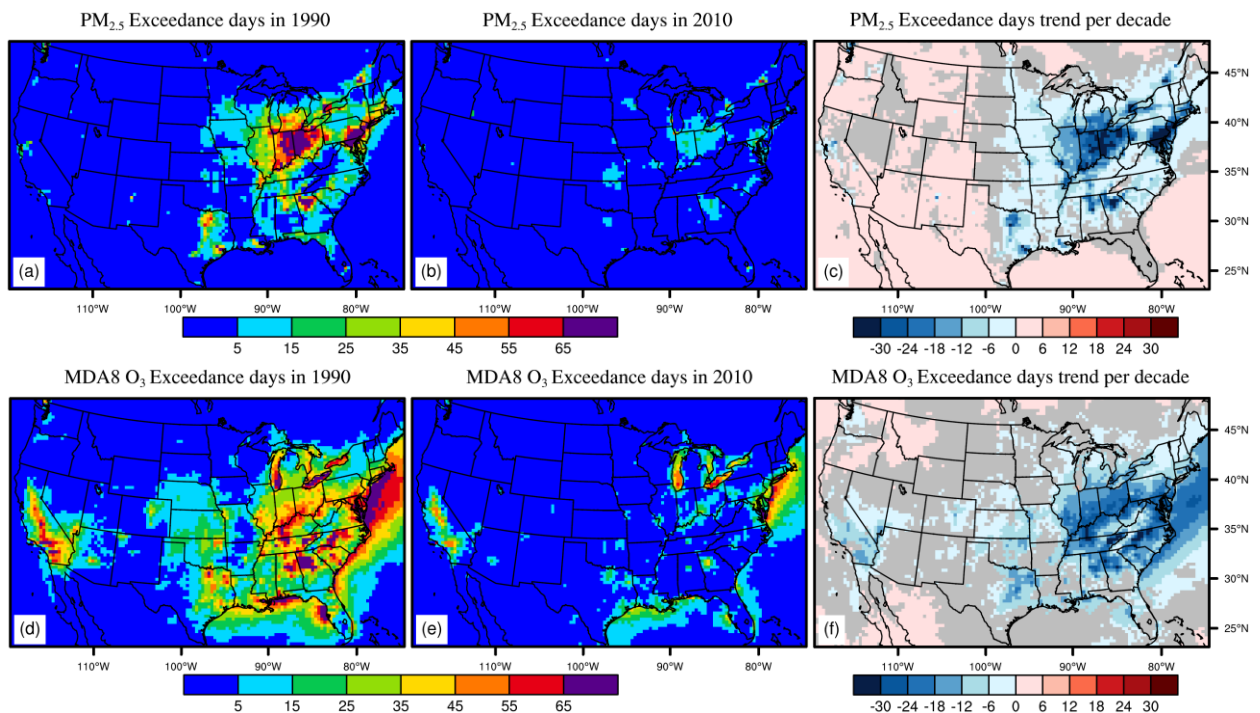

Figure S4. The total days of air quality exceedances for the year 1990 (a, d), 2010, (b, e) and the 21-yr trends (per decade, c,f), for daily  $\text{PM}_{2.5}$  exceeding  $35 \mu\text{g m}^{-3}$ (top), and for daily MDA8  $\text{O}_3$  exceeding 70 ppbv (bottom). The gray areas in (c,f) means the increase/decrease trends are insignificant with p-values for the standard Student-t test larger than 0.05.



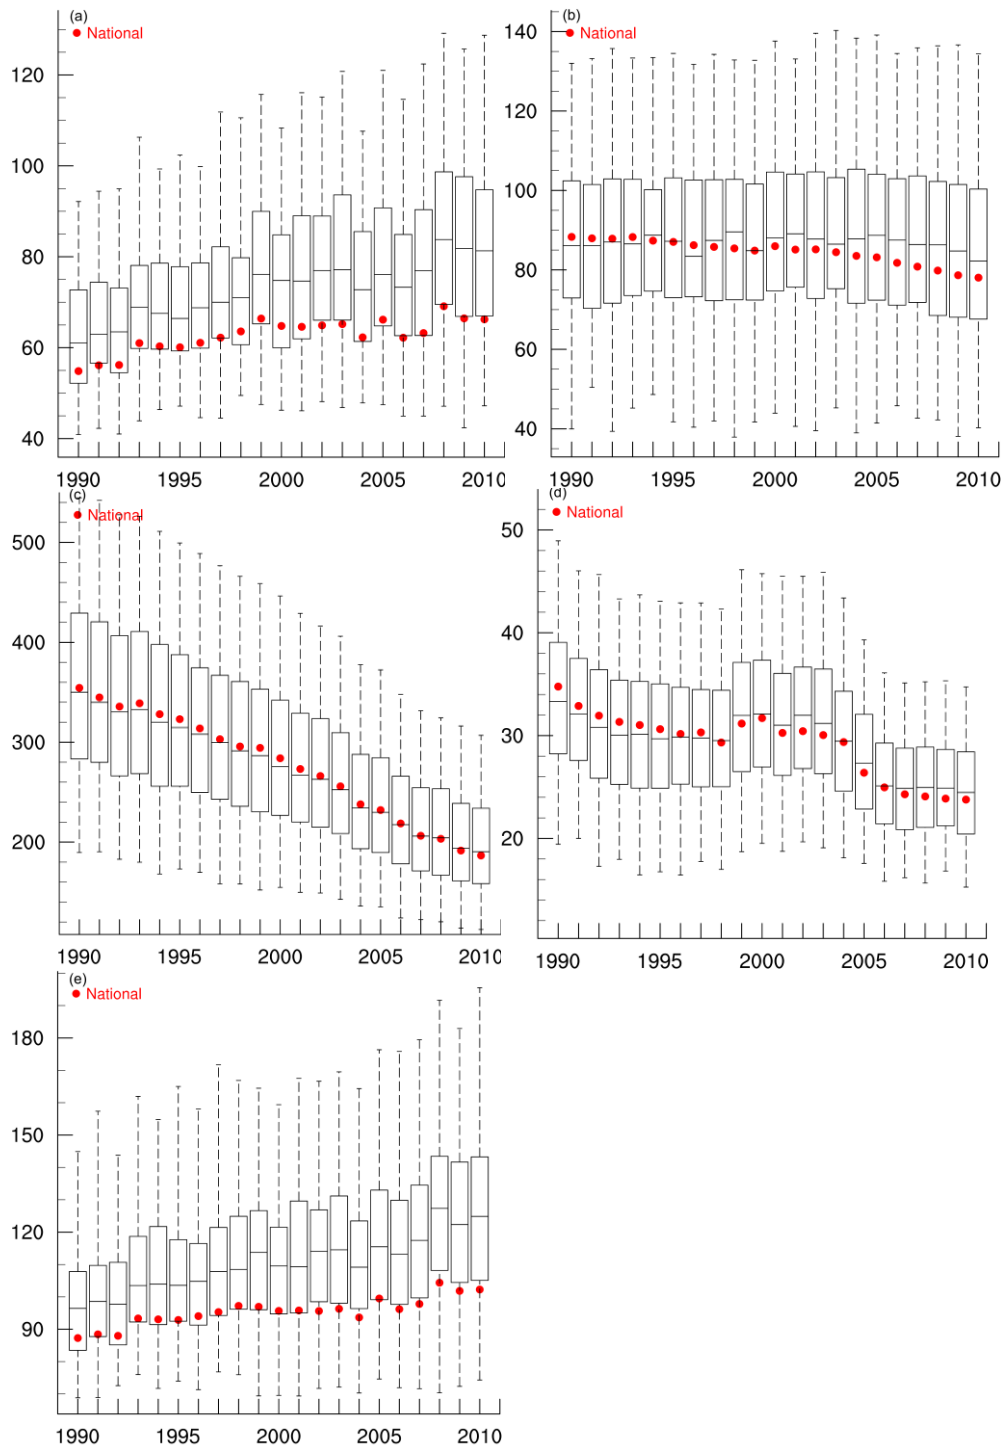

Figure S5: The baseline mortality rates for specific causes of death related with  $PM_{2.5}$ , including chronic obstructive pulmonary disease (a), lung cancer (b), ischemic heart disease (c) and stroke (d), and respiratory diseases related with  $O_3$  (e). The bottom whiskers, bottom border, middle line, top border and the top whiskers of the boxes, indicate the 5th, 25th, 50th, and 75th, 95th percentiles, respectively, across all counties; the red circles are the national average rate. Baseline mortality rates are shown for 1990-1998 after they are corrected to ensure comparability between ICD9 and ICD10 codes.

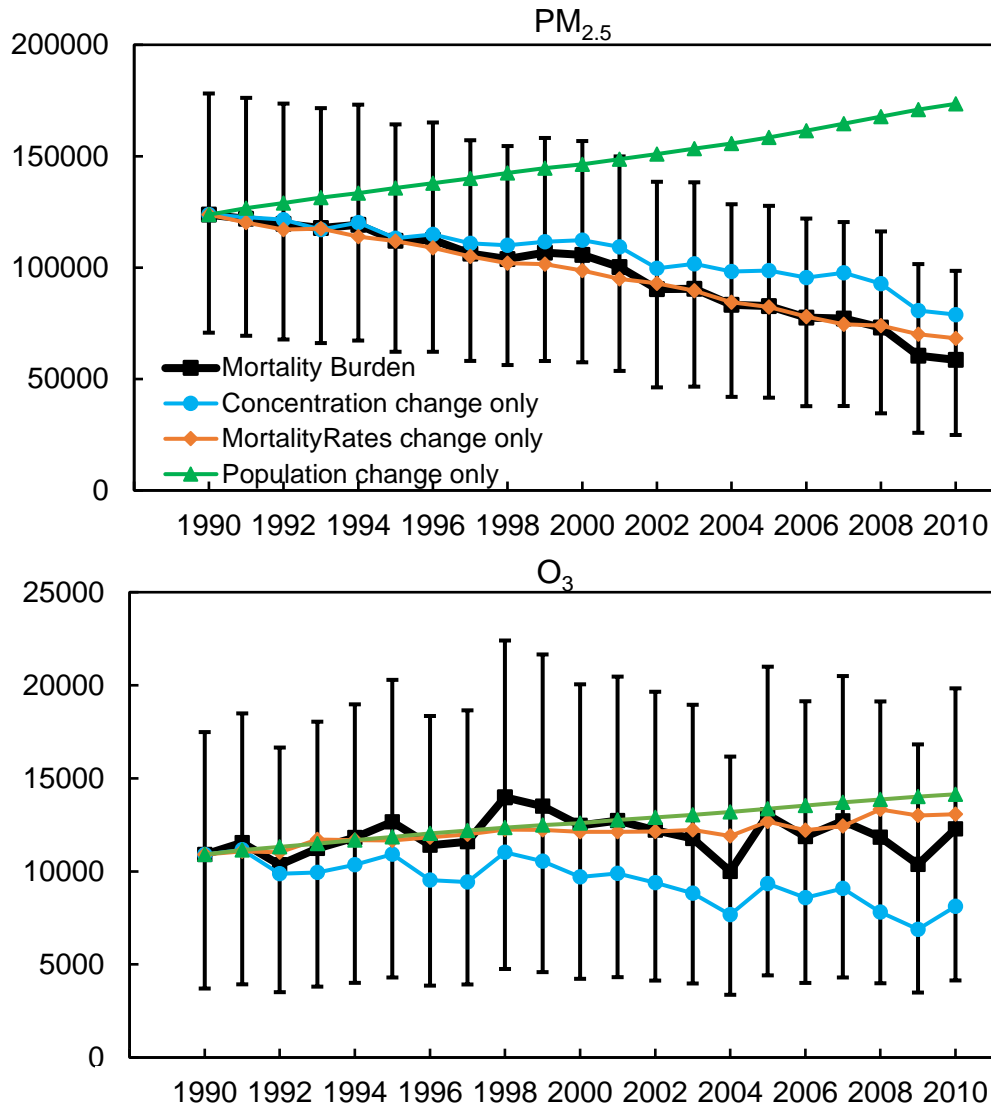

Figure S6: Total mortality burdens (black) attributed to PM<sub>2.5</sub> (top) and O<sub>3</sub> (bottom) considering all the three factors, mortality burden considering the air quality change only (blue), the baseline mortality rates change only (orange), and the population change only (green). Units are deaths yr<sup>-1</sup>. The error bars are the 95% CI for the total mortality burdens (black).

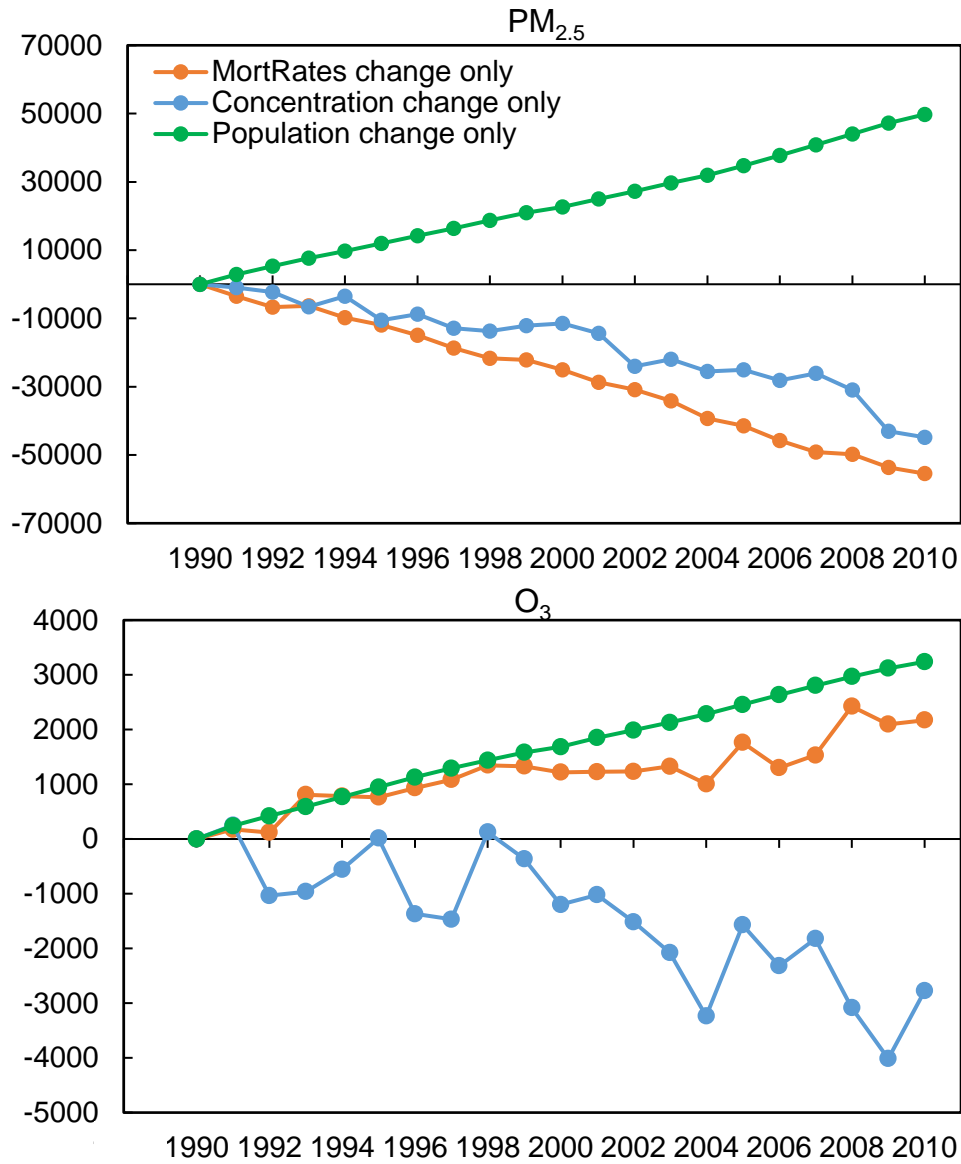

Figure S7: Trends for the absolute contribution of the three factors (baseline mortality rates, ambient air pollution concentration, and exposed population individually), in the net changes of the health burden changes for each year compared with 1990, for PM<sub>2.5</sub> (top) and O<sub>3</sub> (bottom). Units are deaths yr<sup>-1</sup>.

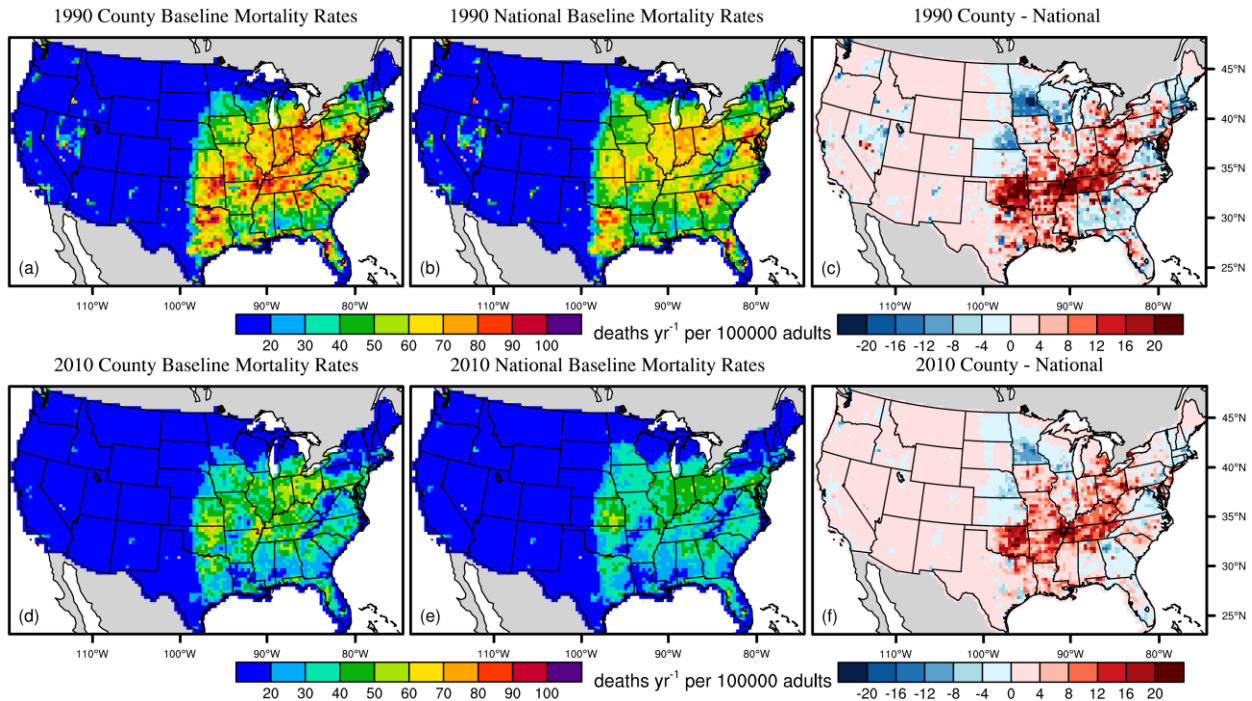

Figure S8. The mortality burden for  $PM_{2.5}$  using county-level baseline mortality rates (a, d), national baseline mortality rates (b, e) and their differences (c, f) for the year 1990 (top) and 2010 (bottom). The units are  $\text{deaths yr}^{-1}$  per 100,000 adults.

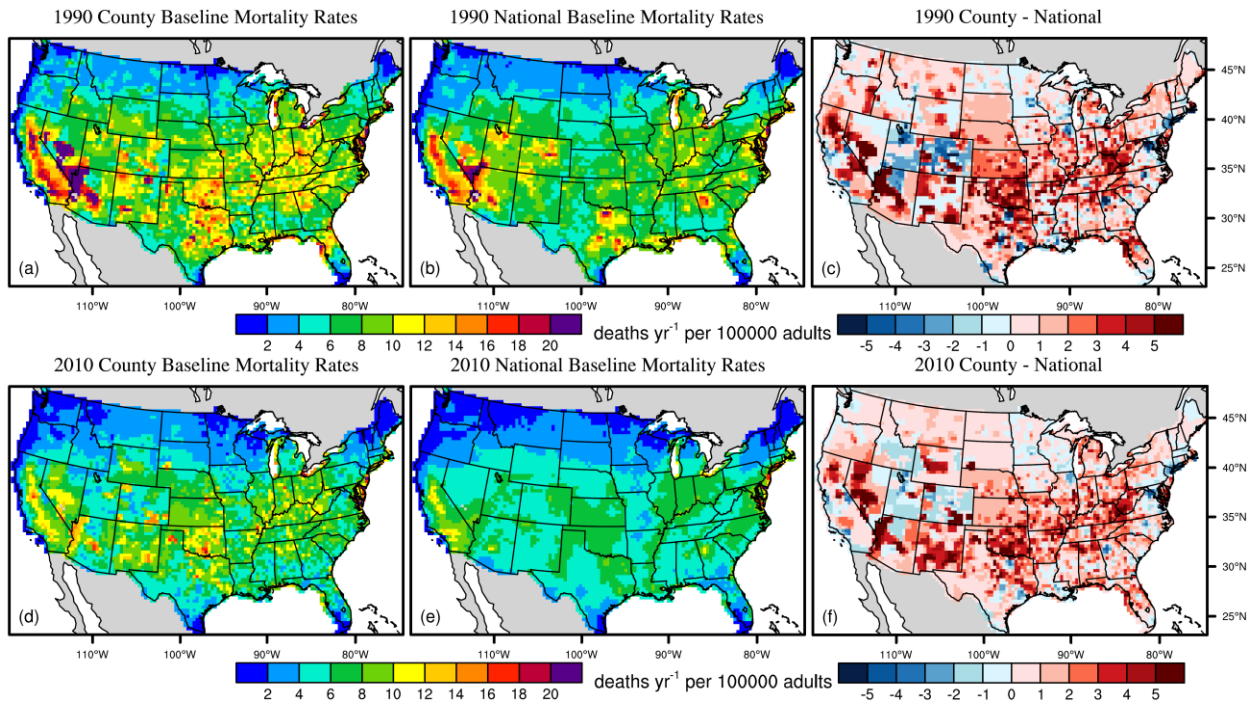

Figure S9. The same as fig. S8 but for the  $O_3$ -related mortality burden.

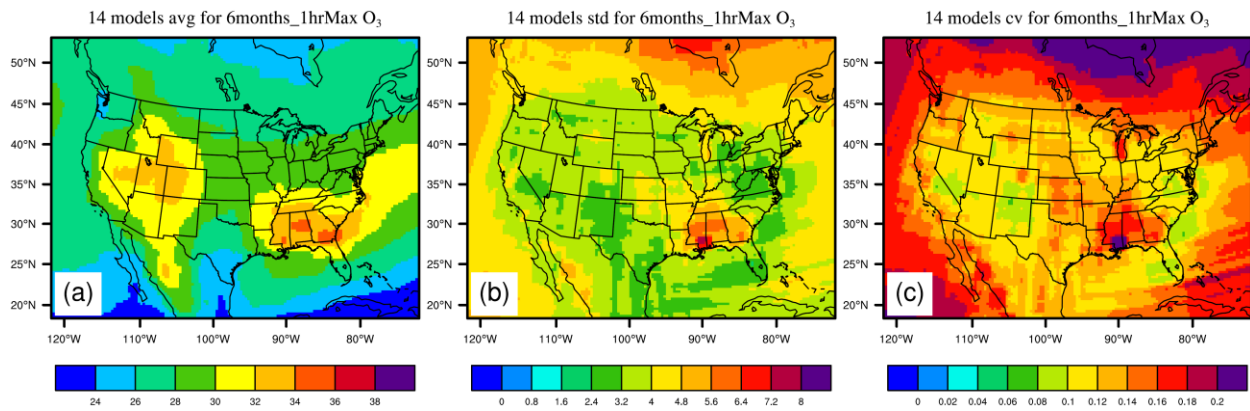

Figure S10. Spatial distribution of the summertime (April to September) average of 1hr daily maximum O<sub>3</sub> in 1850, for a) the 14 model average, b) standard deviation for the 14 models, and c) coefficient of variation. The results are regridded from the ACCMIP 14 model means.
